# Supplementary material for: Structure, stability, and electronic and optical properties of TMDC–coinage metal composites: vertical atomically thin self-assembly of Au clusters
Source: Royal Society of Chemistry journal article supplement (doi:10.1039/d2cp04000j), 2023-01-01
Supplement: d2cp04000j1.pdf [file d2cp04000j1.pdf]

## ELECTRONIC SUPPORTING INFORMATION

### **Structure, stability, electronic and optical properties of TMDC/coinage metal composites: Vertical atomically thin Self-assembly of Au<sub>6</sub> cluster**

**Akanksha Ashok Sangolkar, Pooja, and Ravinder Pawar\***

*Laboratory of Advanced Computation and Theory for Materials and Chemistry, Department of Chemistry, National Institute of Technology Warangal (NITW), Warangal, Telangana-506004, India.*

[ravinder\\_pawar@nitw.ac.in](mailto:ravinder_pawar@nitw.ac.in)

#### **S1: Initial geometry taken for metal clusters adsorbed on TMDCs monolayer**

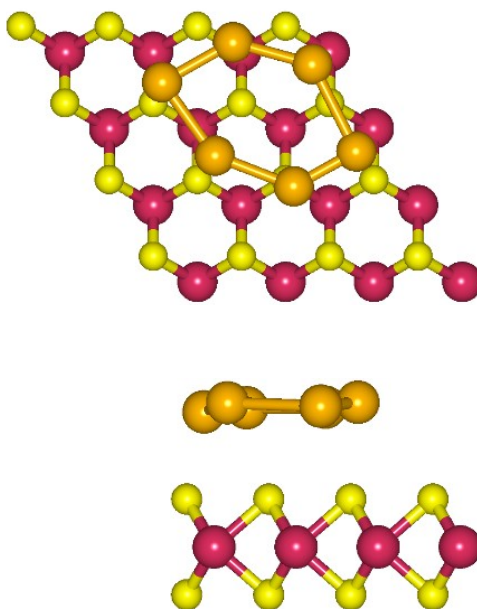

**Figure S1.** Top and side view of the initial geometry metal clusters adsorbed on TMDCs monolayer.

#### **S2: Optimized geometry of TMDCs/M<sub>6</sub> composites, important geometrical parameters.**

The six Ag atoms tend to get clustered on MoS<sub>2</sub> monolayer to give a cone-like cluster where five Ag atoms are in plane forming the base of the cone. The sixth Ag atom is present at the vertex of the cone. The minimum Ag–Ag distance for the basal Ag atoms is 2.82 Å, while the distance between basal Ag and vertex Ag is 2.76 Å which is marginally low in comparison with the Ag–Ag distance observed for the basal Ag atoms. The base of the cone is found to adsorb on the surface of MoS<sub>2</sub> monolayer, whereas its apex faces upwards. The optimized geometry is shown in Figure S2. The basal Ag atoms strongly adhere on the surface *via* the S atoms. The minimum distance between the Ag and S atoms is 2.67 Å. The distance between

apical Ag and S is found to be 3.94 Å. In the optimised geometries, it has been observed that the Ag<sub>6</sub> cluster adsorbs on the surface in a manner that the Ag atoms mostly occupies the atop site of the S. The Ag–S distance ranges from 2.67–3.03 Å.

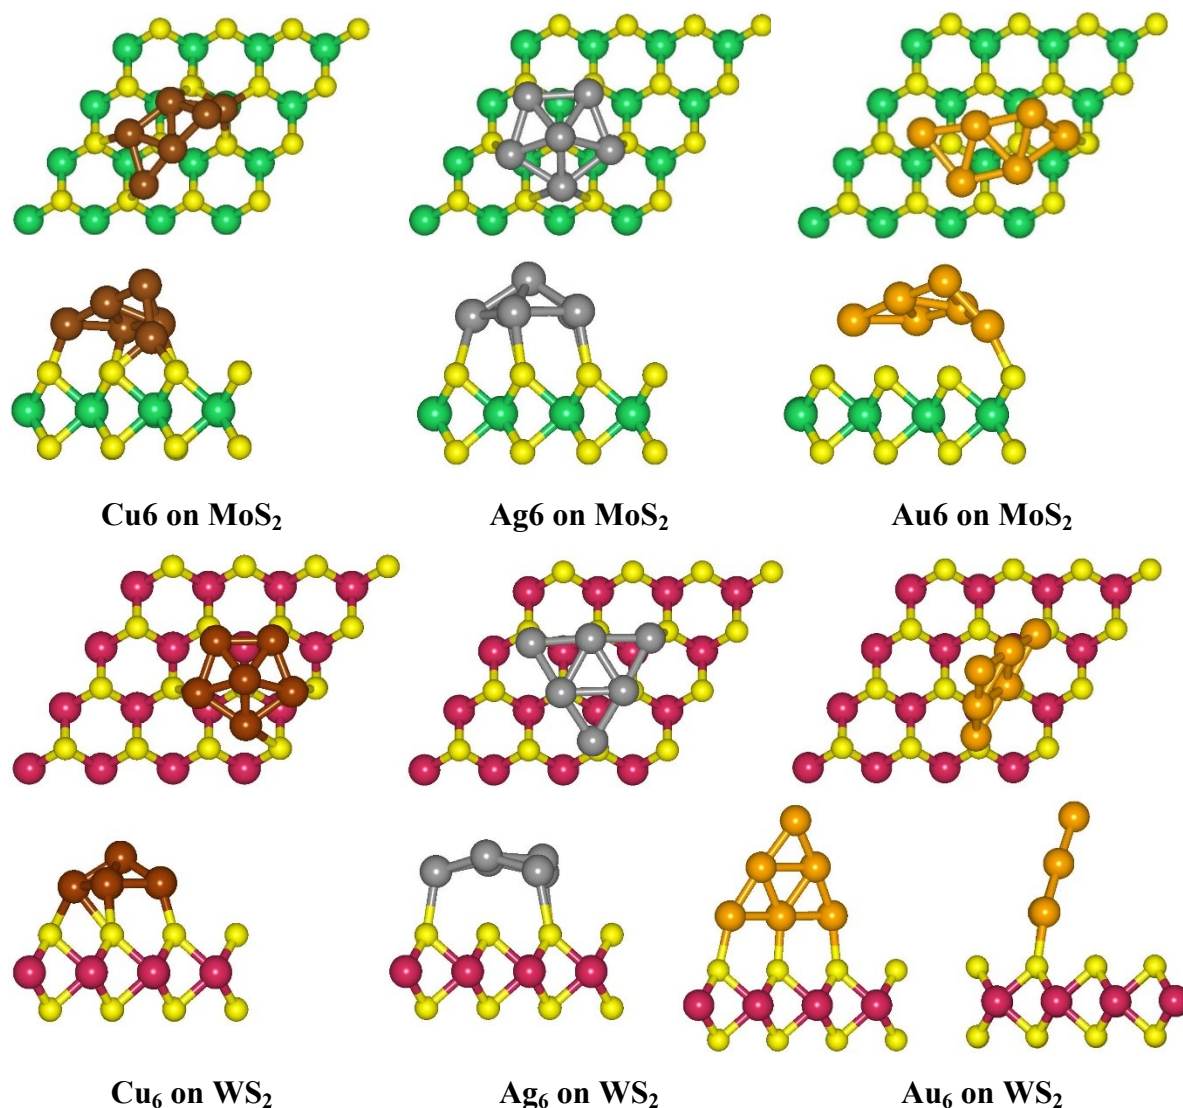

**Figure S2.** Top and side view of the optimized geometries of TMDCs/M<sub>6</sub> composites obtained without inclusion of the dispersion correction. (Color code: Yellow: S, Green: Mo, Brown: Cu, Grey: Ag, and Orange: Au).

Furthermore, Au<sub>6</sub> and Cu<sub>6</sub> cluster was found to adsorb on the MoS<sub>2</sub> surface in an irregular shape. In Au<sub>6</sub> cluster, the five atoms are in plane and one Au is out of plane tilted towards the surface at a distance of 2.44 Å from the S. The Au–Au distances in the Au<sub>6</sub> cluster lies within the range of 2.66–2.89 Å. The Cu<sub>6</sub> clusters adsorbs on the MoS<sub>2</sub> monolayer analogous to the Au<sub>6</sub> cluster. The distance between the Cu and S atom vary from 2.32 to 2.53 Å. This clearly suggests that the Cu<sub>6</sub> cluster is more closely bound to the S atoms on the MoS<sub>2</sub> layer. The Cu–Cu distance in Cu<sub>6</sub> cluster on MoS<sub>2</sub> ranges from 2.38 to 2.62 Å. It should be

noted that there is no significant variation in the geometry of TMDCs monolayer is observed after the adsorption of coinage metal cluster.

The distance between the terminal Ag atoms to the closest S ranges from 2.82 to 2.85 Å, while the internal Ag atoms are 3.27 to 3.44 Å. This solely indicates that the terminal Ag atoms are more closely bound to the surface than the internal Ag atoms. The Ag–Ag distance in 2D Ag<sub>6</sub> cluster adsorbed on WS<sub>2</sub> surface varies from 2.74–2.83 Å and the Au–Au distances in 2D Au<sub>6</sub> cluster on WS<sub>2</sub> ranges from 2.65 to 2.87 Å. The minimum S–Au distance in WS<sub>2</sub>/Au<sub>6</sub> composite is 2.52 Å. The distance between the apical Au atom with the closest S of WS<sub>2</sub> is 6.88 Å. Therefore, it is apparent from the geometry that both the Ag<sub>6</sub> and Au<sub>6</sub> clusters preferably achieve the 2D triangular morphology on WS<sub>2</sub> monolayer. The calculated angle on inclination of the planar 2D Au<sub>6</sub> cluster is 75.79 degrees from the WS<sub>2</sub> surface.

### S3: Interaction Energy (IE) and its Various Components for TMDCs/M<sub>6</sub> composite (GGA-PBE).

**Table S1. Interaction Energy (IE) and its Various Components for TMDCs/M<sub>6</sub> composite (GGA-PBE).**

| System                              | Pauli | Electrostatic | Steric | Orbital | IE    |
|-------------------------------------|-------|---------------|--------|---------|-------|
| Cu <sub>6</sub> on MoS <sub>2</sub> | 21.00 | -13.65        | 7.35   | -10.09  | -2.74 |
| Ag <sub>6</sub> on MoS <sub>2</sub> | 8.66  | -5.76         | 2.90   | -4.07   | -1.17 |
| Au <sub>6</sub> on MoS <sub>2</sub> | 8.66  | -5.68         | 2.98   | -4.82   | -1.84 |
| Cu <sub>6</sub> on WS <sub>2</sub>  | 15.94 | -10.52        | 5.43   | -7.32   | -1.90 |
| Ag <sub>6</sub> on WS <sub>2</sub>  | 4.43  | -2.96         | 1.47   | -2.10   | -0.63 |
| Au <sub>6</sub> on WS <sub>2</sub>  | 9.16  | -6.20         | 2.96   | -3.87   | -0.91 |

\* All the energy values are given in eV

### S4: *Ab initio* molecular dynamics (AIMD) simulation.

#### (a) AIMD simulation of WS<sub>2</sub>/Au<sub>6</sub> composite for 20 ps

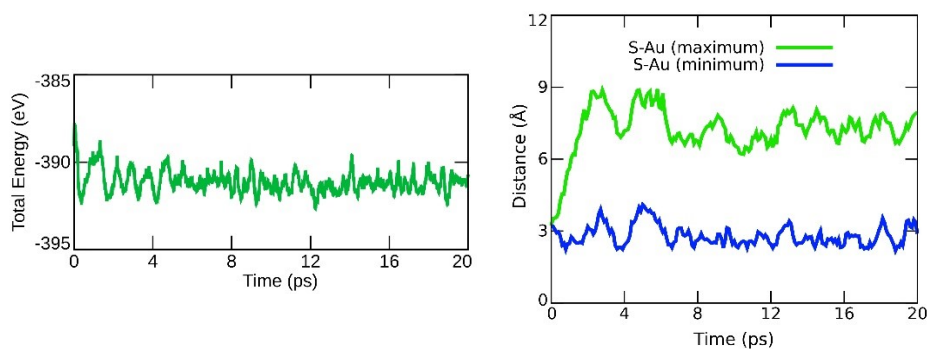

(a)

(b)

**Figure S3.** Variation in (a) energy and (b) Au–S distances during the AIMD simulation (20 ps) of Au<sub>6</sub> cluster on the surface on WS<sub>2</sub> monolayer.

There are no significantly larger fluctuations in energy can be observed during the simulation and the energy of the system seems to attain the equilibrium. Moreover, the distance between the S with the closest Au mostly lies between 2.5 to 3.5 Å which indicates that the contact of Au<sub>6</sub> cluster is maintained on the WS<sub>2</sub> monolayer. The distance between the S and the farthest Au atom increases gradually up to 3.5 ps due to the upward motion of the Au atoms during its vertical assembly. After 6.5 ps, the minimum distance between the S and the farthest Au mostly fluctuates within the range of 6.5 to 8.2 Å. These fluctuations are in agreement with the calculated distance between the closest S and the apical Au (6.88 Å) in the optimized geometry of the WS<sub>2</sub>/Au<sub>6</sub> composite.

**(b) AIMD simulation of WS<sub>2</sub>/Au<sub>7</sub> composite for 10 ps.**

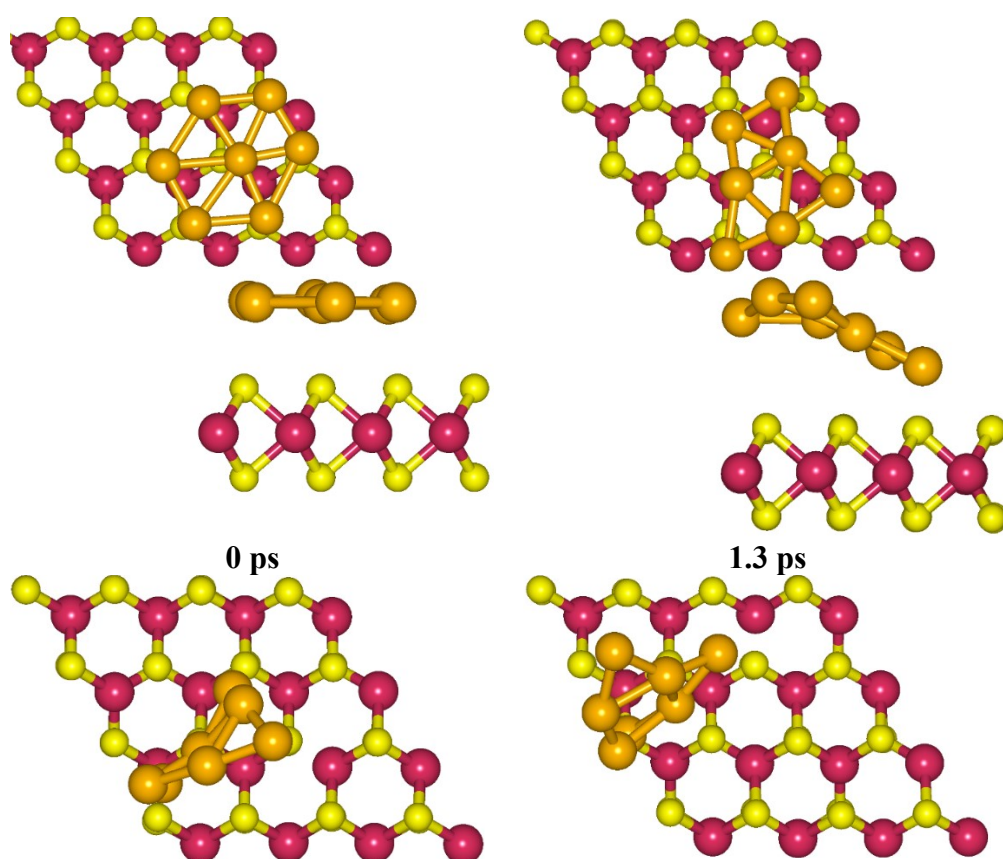

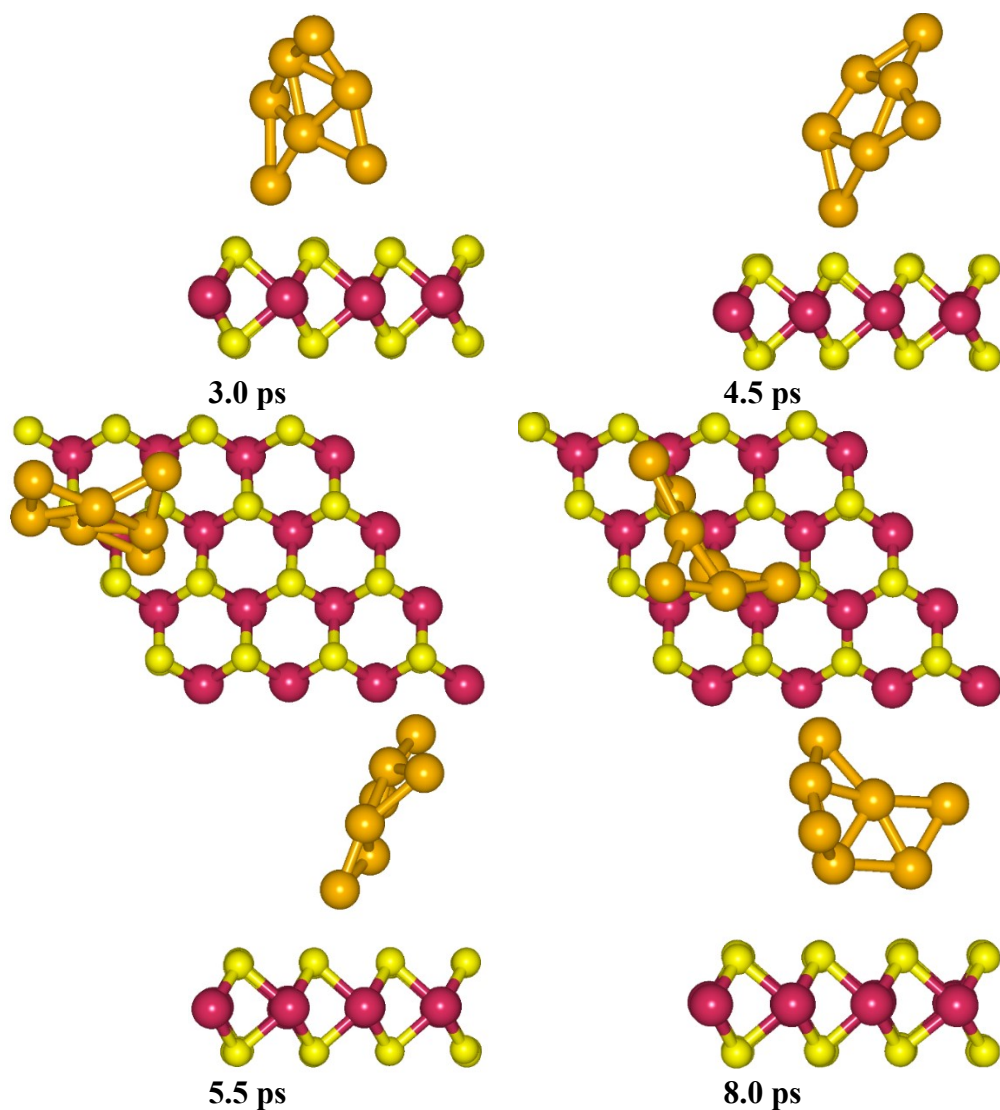

**Figure S4.** Top and side view of some important geometries of  $\text{WS}_2/\text{Au}_7$  obtained during the AIMD simulation. (Color code: Yellow: S, Pink: W, and Orange: Au)

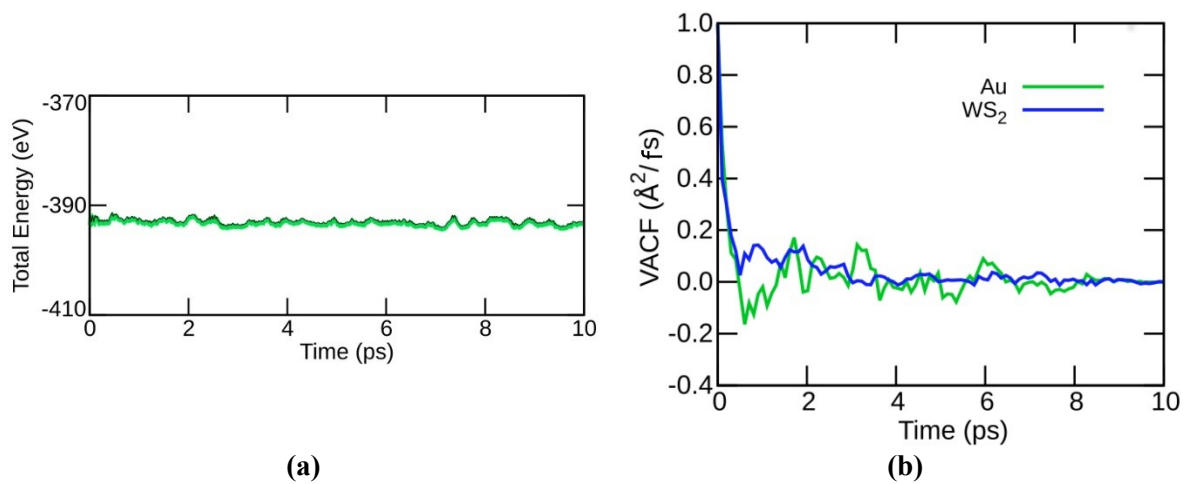

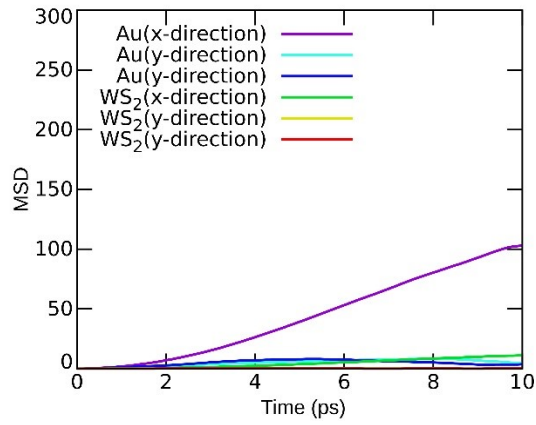

(c)

**Figure S5.** (a) Variation in the total energy with time and (b) Velocity average autocorrelation function. (c) Mean square displacement of Au<sub>7</sub> on WS<sub>2</sub> monolayer.

**S5: The variation in the potential energy of the system in TMDCs/M<sub>6</sub> composites**

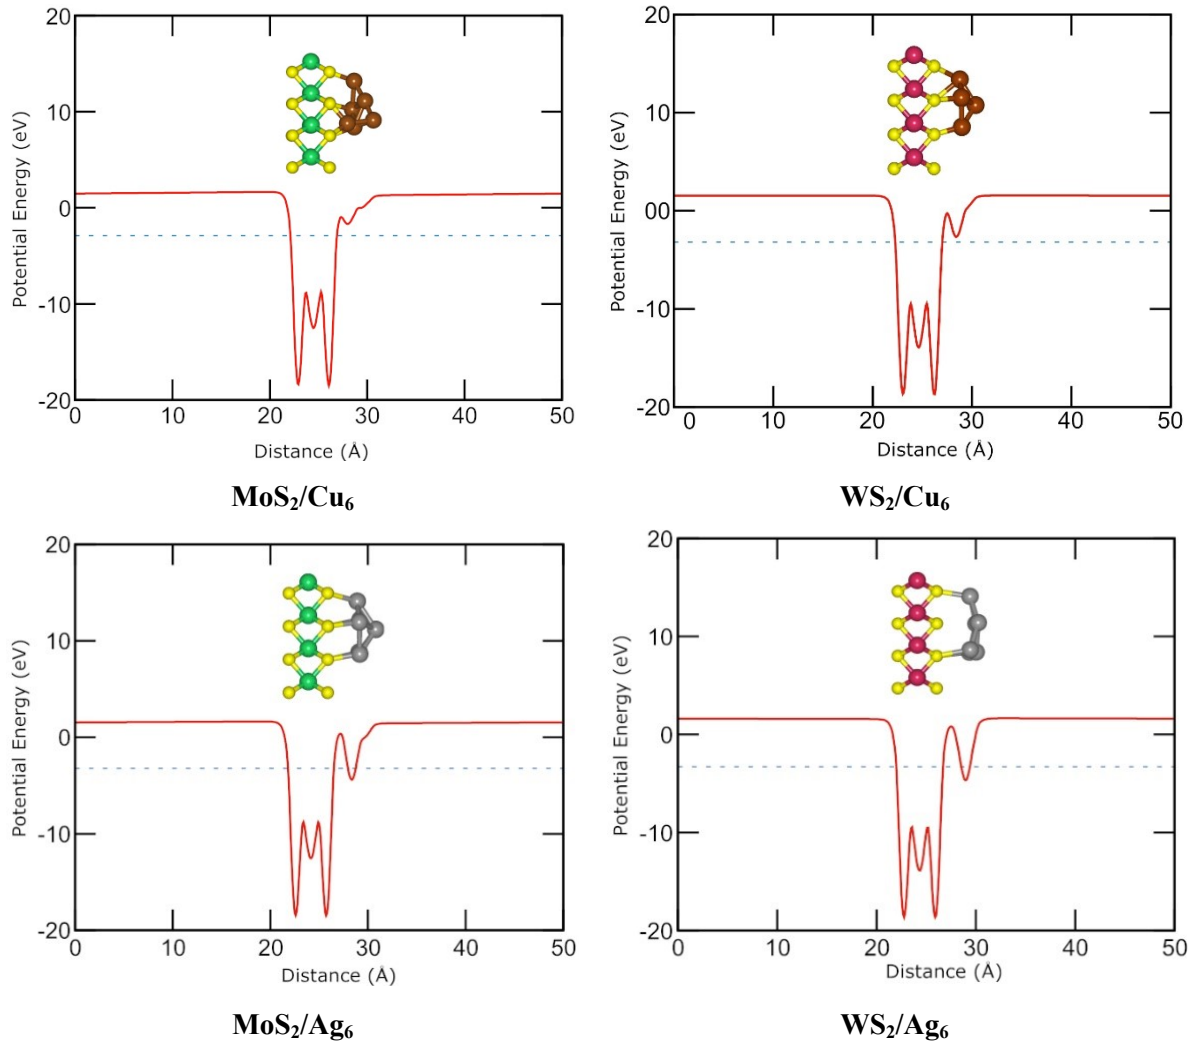



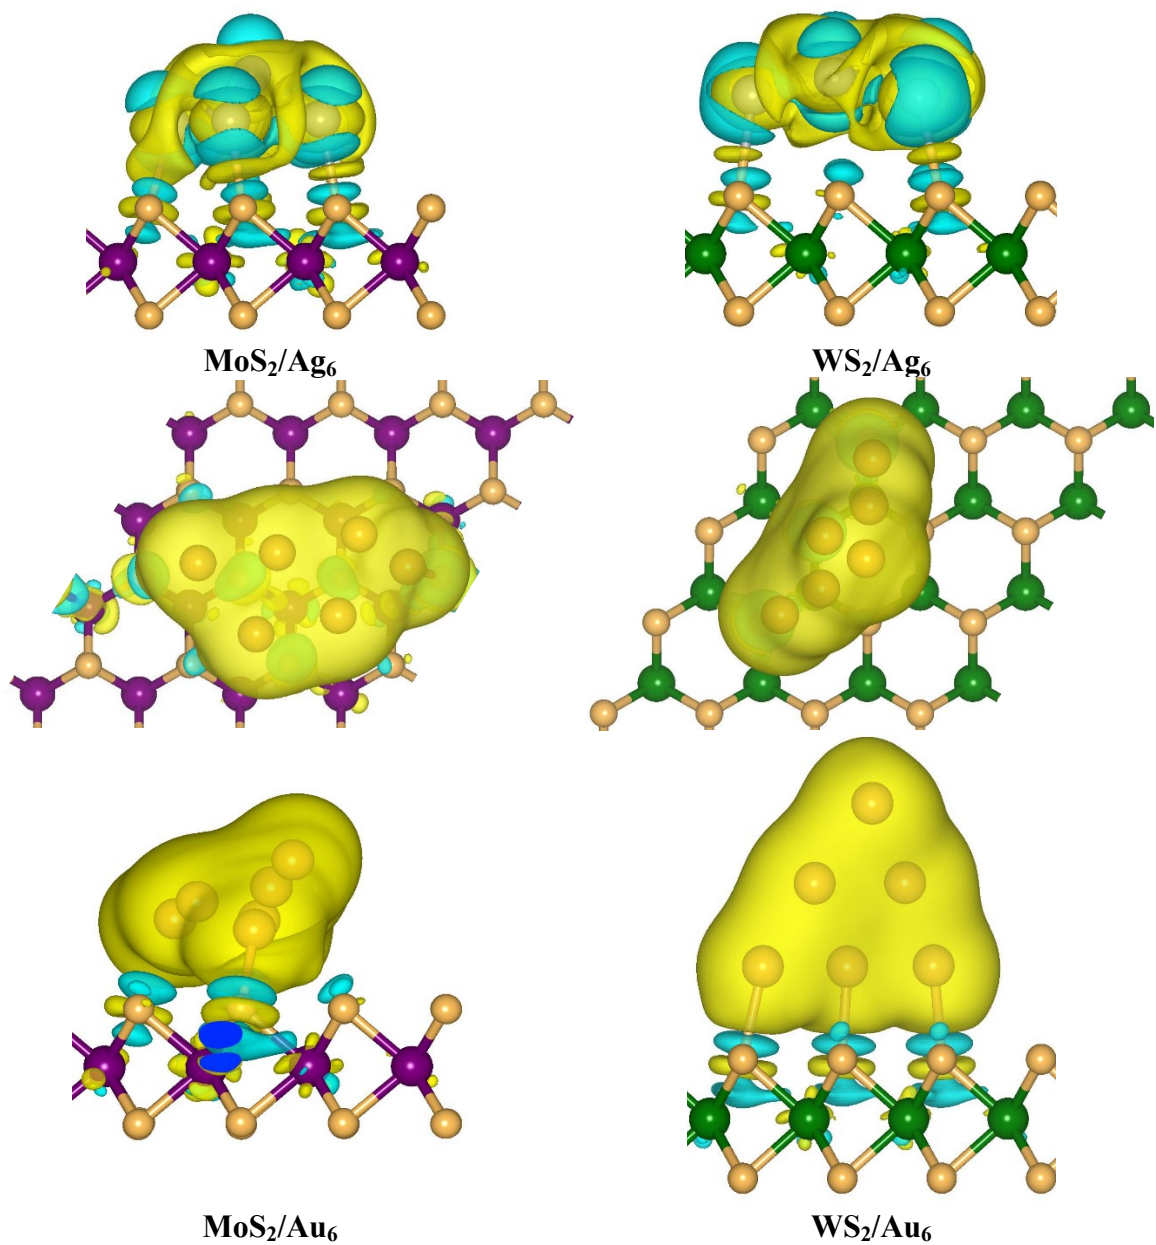

**Figure S7.** Top and side view of the differential charge density plots for TMDCs/M<sub>6</sub> composites. (Colour code for isosurface: Cyan=Electron depleted region; Yellow=Electron enhanced region; Colour code for balls: Purple=Mo; Green=W; Orange=S)



## S7: Optical properties

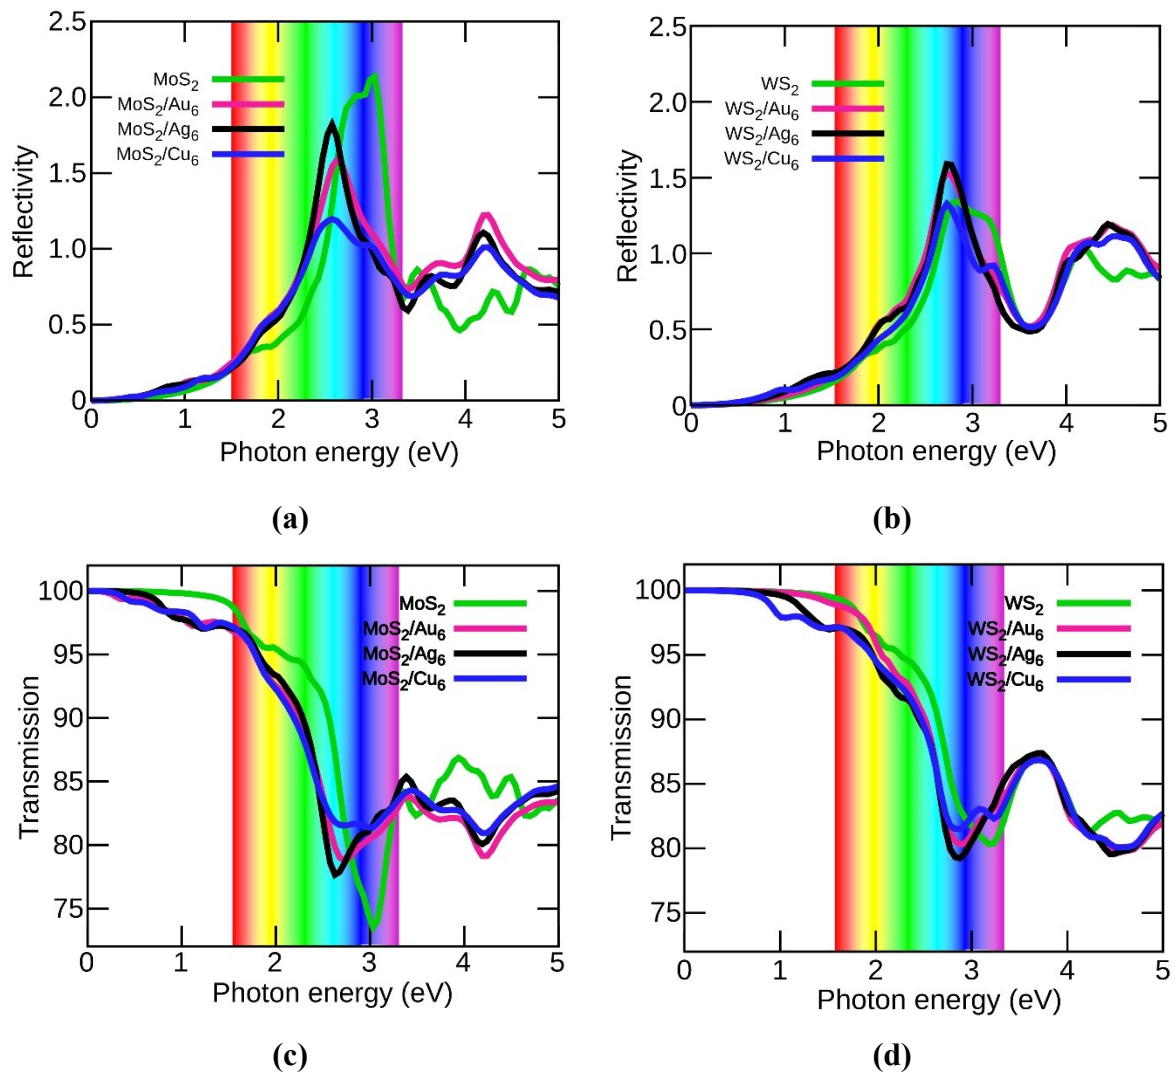

**Figure S8.** Optical properties of pristine TMDCs and TMDCs/ $M_6$  composites (a) Reflectivity spectra for pristine MoS<sub>2</sub> and MoS<sub>2</sub>/ $M_6$  composites, (b) Reflectivity spectra for pristine WS<sub>2</sub> and WS<sub>2</sub>/ $M_6$  composites, (c) transmission spectra for pristine MoS<sub>2</sub> and MoS<sub>2</sub>/ $M_6$  composites, (d) Transmission spectra for pristine WS<sub>2</sub> and WS<sub>2</sub>/ $M_6$  composites.
